# Supplementary material
Source: MDPI journal article supplement (https://www.mdpi.com/1996-1073/15/13/4707)
Supplement: s1 [file s1]

Table S1. Elemental composition of the lignin and oil samples. In the case of replicate experiments performed, the value presented in the table is an average of the experiments in question.

| Sample name   | mol % N | mol % C | mol % S | mol % H | mol % O | O/C  | H/C  |
|---------------|---------|---------|---------|---------|---------|------|------|
| SW1           | 0.01    | 3.92    | 0.0902  | 5.31    | 2.79    | 0.71 | 1.35 |
| SW1-kraft-320 | 0.06    | 5.92    | 0.0032  | 7.40    | 1.29    | 0.22 | 1.25 |
| SW1-kraft-360 | 0.06    | 6.40    | 0.0026  | 8.11    | 0.88    | 0.14 | 1.27 |
| HW1           | 0.02    | 5.00    | 0.0003  | 5.96    | 2.11    | 0.42 | 1.19 |
| HW1-wetox-320 | 0.08    | 5.73    | 0.0010  | 7.20    | 1.43    | 0.25 | 1.26 |
| HW1-wetox-360 | 0.07    | 6.06    | 0.0006  | 7.36    | 1.18    | 0.19 | 1.21 |
| G1            | 0.02    | 5.03    | 0.0003  | 5.38    | 2.12    | 0.42 | 1.07 |
| G1-wetox-320  | 0.08    | 5.74    | 0.0004  | 6.89    | 1.44    | 0.25 | 1.20 |
| G1-wetox-360  | 0.08    | 6.23    | 0.0009  | 7.73    | 1.02    | 0.16 | 1.24 |
| HW2           | 0.02    | 3.74    | 0.0004  | 5.08    | 3.11    | 0.83 | 1.36 |
| HW2-milox-320 | 0.08    | 6.09    | 0.0011  | 7.99    | 1.11    | 0.18 | 1.31 |
| HW2-milox-360 | 0.08    | 6.39    | 0.0011  | 8.40    | 0.86    | 0.14 | 1.31 |
| G2            | 0.20    | 3.60    | 0.0012  | 5.88    | 3.01    | 0.84 | 1.63 |
| G2-deac-320   | 0.23    | 6.10    | 0.0017  | 8.67    | 0.93    | 0.15 | 1.42 |
| G2-deac-360   | 0.24    | 6.26    | 0.0007  | 9.03    | 0.78    | 0.12 | 1.44 |
| G3            | 0.16    | 3.34    | 0.0007  | 5.18    | 3.28    | 0.98 | 1.55 |
| G3-deac-320   | 0.18    | 6.21    | 0.0010  | 9.30    | 1.05    | 0.14 | 1.50 |
| G3-deac-360   | 0.21    | 6.23    | 0.0007  | 9.06    | 0.82    | 0.13 | 1.45 |
| G4            | 0.15    | 3.35    | 0.0011  | 5.63    | 3.25    | 0.97 | 1.68 |
| G4-deac-320   | 0.21    | 6.15    | 0.0011  | 9.25    | 0.87    | 0.14 | 1.51 |
| G4-deac-360   | 0.22    | 6.26    | 0.0013  | 9.35    | 0.78    | 0.12 | 1.49 |
| G5            | 0.20    | 3.87    | 0.0329  | 5.37    | 2.78    | 0.72 | 1.39 |
| G5-acid-320   | 0.21    | 6.09    | 0.0009  | 8.48    | 0.97    | 0.16 | 1.39 |
| G5-acid-360   | 0.22    | 6.26    | 0.0016  | 8.91    | 0.80    | 0.13 | 1.42 |
| SW2           | 0.06    | 5.12    | 0.0308  | 5.86    | 1.93    | 0.38 | 1.14 |
| SW2-kraft-320 | 0.08    | 5.87    | 0.0009  | 7.06    | 1.34    | 0.23 | 1.20 |
| SW2-kraft-360 | 0.05    | 6.11    | 0.0010  | 7.57    | 1.15    | 0.19 | 1.24 |
| SW4           | 0.01    | 4.86    | 0.002   | 5.19    | 2.26    | 0.47 | 1.07 |
| SW4-wetox-320 | 0.08    | 5.81    | 0.003   | 6.80    | 1.39    | 0.24 | 1.17 |
| SW4-wetox-360 | 0.07    | 5.95    | 0.003   | 6.51    | 1.31    | 0.22 | 1.09 |

Table S2. Quantification of selected compounds (weight percent of bio-oil). The sample with the highest content of each compound is given in bold.

|                             | SW1-<br>kraft-<br>320 | SW1-<br>kraft-<br>360 | HW1-<br>wetox<br>-320 | HW1-<br>wetox-<br>360 | G1-<br>wetox-<br>320 | G1-<br>wetox-<br>360 | HW2-<br>milox-<br>320 | HW2-<br>milox-<br>360 | G2-<br>deac-<br>320 | G2-<br>dec-<br>360 | G3-<br>deac-<br>320 | G3-<br>deac-<br>360 | G4-<br>deac-<br>320 | G4-<br>deac-<br>360 | G5-<br>acid-<br>320 | G5-<br>acid-<br>360 | SW2-<br>kraft-<br>320 | SW2-<br>kraft-<br>360 | SW4-<br>wetox<br>-320 | SW4-<br>wetox<br>-360 |
|-----------------------------|-----------------------|-----------------------|-----------------------|-----------------------|----------------------|----------------------|-----------------------|-----------------------|---------------------|--------------------|---------------------|---------------------|---------------------|---------------------|---------------------|---------------------|-----------------------|-----------------------|-----------------------|-----------------------|
| Phenol                      | 0.140                 | 0.297                 | 0.001                 | 0.095                 | 0.113                | 0.182                | 0.120                 | 0.160                 | 0.146               | 0.239              | 0.266               | 0.470               | 0.270               | <b>0.473</b>        | 0.390               | 0.445               | 0.238                 | 0.272                 | 0.004                 | 0.005                 |
| Phenylethylalcohol          | NA                    | NA                    | NA                    | NA                    | NA                   | NA                   | NA                    | NA                    | 0.001               | 0.076              | 0.068               | 0.100               | 0.086               | <b>0.140</b>        | 0.041               | NA                  | NA                    | NA                    | NA                    | NA                    |
| Syringol                    | NA                    | NA                    | 0.880                 | 0.755                 | <b>1.077</b>         | 0.100                | 0.054                 | NA                    | NA                  | NA                 | NA                  | NA                  | NA                  | NA                  | 0.085               | NA                  | NA                    | NA                    | NA                    | NA                    |
| 4-methylphenol              | 0.078                 | <b>0.326</b>          | NA                    | 0.118                 | Trace                | 0.214                | NA                    | 0.090                 | 0.073               | 0.180              | 0.093               | 0.260               | 0.133               | 0.277               | 0.160               | 0.296               | 0.122                 | 0.246                 | NA                    | 0.013                 |
| guaiacol                    | 0.583                 | 0.152                 | 1.308                 | 1.074                 | 1.408                | 0.662                | 0.363                 | 0.118                 | 0.135               | 0.047              | 0.332               | 0.256               | 0.232               | 0.189               | 0.661               | 0.206               | <b>1.793</b>          | 0.660                 | 0.145                 | 0.145                 |
| 4-methylguaiacol            | 0.059                 | 0.019                 | 0.273                 | 0.294                 | <b>0.464</b>         | 0.141                | 0.024                 | NA                    | 0.014               | Trace              | NA                  | NA                  | NA                  | NA                  | NA                  | NA                  | 0.340                 | 0.136                 | 0.043                 | 0.061                 |
| Catechol                    | 0.942                 | 0.108                 | 0.347                 | 0.627                 | 0.473                | 0.671                | 0.376                 | 0.292                 | 0.464               | 0.381              | 0.792               | 0.940               | 0.481               | 1.014               | 0.764               | 0.887               | <b>1.520</b>          | 1.243                 | 0.052                 | 0.018                 |
| 3-methylcatechol            | 0.260                 | 0.092                 | 0.088                 | 0.130                 | 0.179                | 0.117                | 0.121                 | 0.055                 | 0.039               | 0.043              | NA                  | 0.123               | NA                  | 0.140               | 0.077               | 0.094               | 0.099                 | 0.155                 | 0.018                 | 0.030                 |
| 4-ethylcatechol             | 0.466                 | 0.173                 | 0.071                 | 0.190                 | 0.132                | 0.297                | 0.100                 | 0.133                 | 0.396               | 0.466              | 0.804               | 1.216               | 0.504               | 0.752               | 0.968               | <b>1.282</b>        | 0.662                 | 0.726                 | trace                 | 0.012                 |
| 4-propylguaiacol            | 0.146                 | 0.064                 | 0.101                 | 0.079                 | 0.091                | 0.065                | 0.051                 | 0.010                 | 0.001               | NA                 | NA                  | NA                  | 0.017               | NA                  | 0.045               | NA                  | <b>0.322</b>          | 0.076                 | 0.030                 | 0.027                 |
| 3-methoxycatechol           | NA                    | NA                    | <b>0.430</b>          | 0.347                 | 0.315                | 0.013                | 0.030                 | NA                    | 0.001               | NA                 | 0.053               | NA                  | 0.033               | NA                  | 0.084               | NA                  | NA                    | NA                    | NA                    | NA                    |
| 2-naphthol                  | Trace                 | Trace                 | NA                    | 0.052                 | Trace                | 0.046                | Trace                 | 0.010                 | 0.001               | Trace              | 0.055               | <b>0.081</b>        | 0.047               | 0.001               | 0.065               | 0.078               | 0.075                 | 0.084                 | NA                    | NA                    |
| 4-ethylphenol               | 0.060                 | 0.137                 | Trace                 | 0.040                 | Trace                | 0.084                | Trace                 | 0.050                 | 0.574               | 0.820              | 0.938               | <b>1.656</b>        | 1.017               | 1.178               | 1.135               | 1.323               | 0.151                 | 0.206                 | NA                    | NA                    |
| 4-ethylguaiacol             | 0.240                 | 0.037                 | 0.155                 | 0.232                 | 0.150                | 0.157                | 0.094                 | 0.030                 | 0.195               | 0.051              | 0.549               | 0.494               | 0.312               | 0.190               | <b>1.238</b>        | 0.442               | 0.881                 | 0.303                 | 0.009                 | 0.017                 |
| 2-(4-hydroxy-phenyl)ethanol | NA                    | NA                    | 0.001                 | NA                    | NA                   | NA                   | NA                    | NA                    | 0.119               | NA                 | 0.186               | 0.211               | 0.143               | <b>0.348</b>        | 0.105               | 0.132               | Trace                 | Trace                 | 0.012                 | NA                    |

Table S3. Results from regression modelling of the individual compounds based on biomass origin, pretreatment method and temperature.

The higher the regression coefficient, the better the model explains the results.

| Compounds                  | Regression coefficient R<br>Biomass | Regression coefficient R<br>Pretreatment | Regression coefficient R<br>Temperature |
|----------------------------|-------------------------------------|------------------------------------------|-----------------------------------------|
| Phenol                     | 0.623                               | 0.821                                    | 0.329                                   |
| Phenylethylalcohol         | 0.604                               | 0.738                                    | 0.140                                   |
| Syringol                   | 0.457                               | 0.531                                    | 0.192                                   |
| 4-methylphenol             | 0.420                               | 0.620                                    | 0.651                                   |
| Guaiacol                   | 0.245                               | 0.455                                    | 0.353                                   |
| 4-methylguaiacol           | 0.251                               | 0.556                                    | 0.209                                   |
| Catechol                   | 0.272                               | 0.594                                    | 0.004                                   |
| 3-methylcatechol           | 0.197                               | 0.504                                    | 0.080                                   |
| 4-ethylcatechol            | 0.592                               | 0.800                                    | 0.150                                   |
| 4-propylguaiacol           | 0.526                               | 0.513                                    | 0.330                                   |
| 3-methoxycatechol          | 0.556                               | 0.488                                    | 0.227                                   |
| 2-naphthol                 | 0.259                               | 0.402                                    | 0.165                                   |
| 4-ethylphenol              | 0.751                               | 0.929                                    | 0.150                                   |
| 4-ethylguaiacol            | 0.322                               | 0.499                                    | 0.308                                   |
| 2-(4-hydroxyphenyl)ethanol | 0.640                               | 0.785                                    | 0.065                                   |
